# Supplementary material for: Sequence and Structure Analysis of Distantly-Related Viruses Reveals Extensive Gene Transfer between Viruses and Hosts and among Viruses
Source: MDPI journal article supplement (doi:10.3390/v7102882), 2015-10-19
Supplement: s1 [file s1]

# Sequence and Structure Analysis of Distantly-Related Viruses Reveals Extensive Gene Transfer between Viruses and Hosts and among Viruses

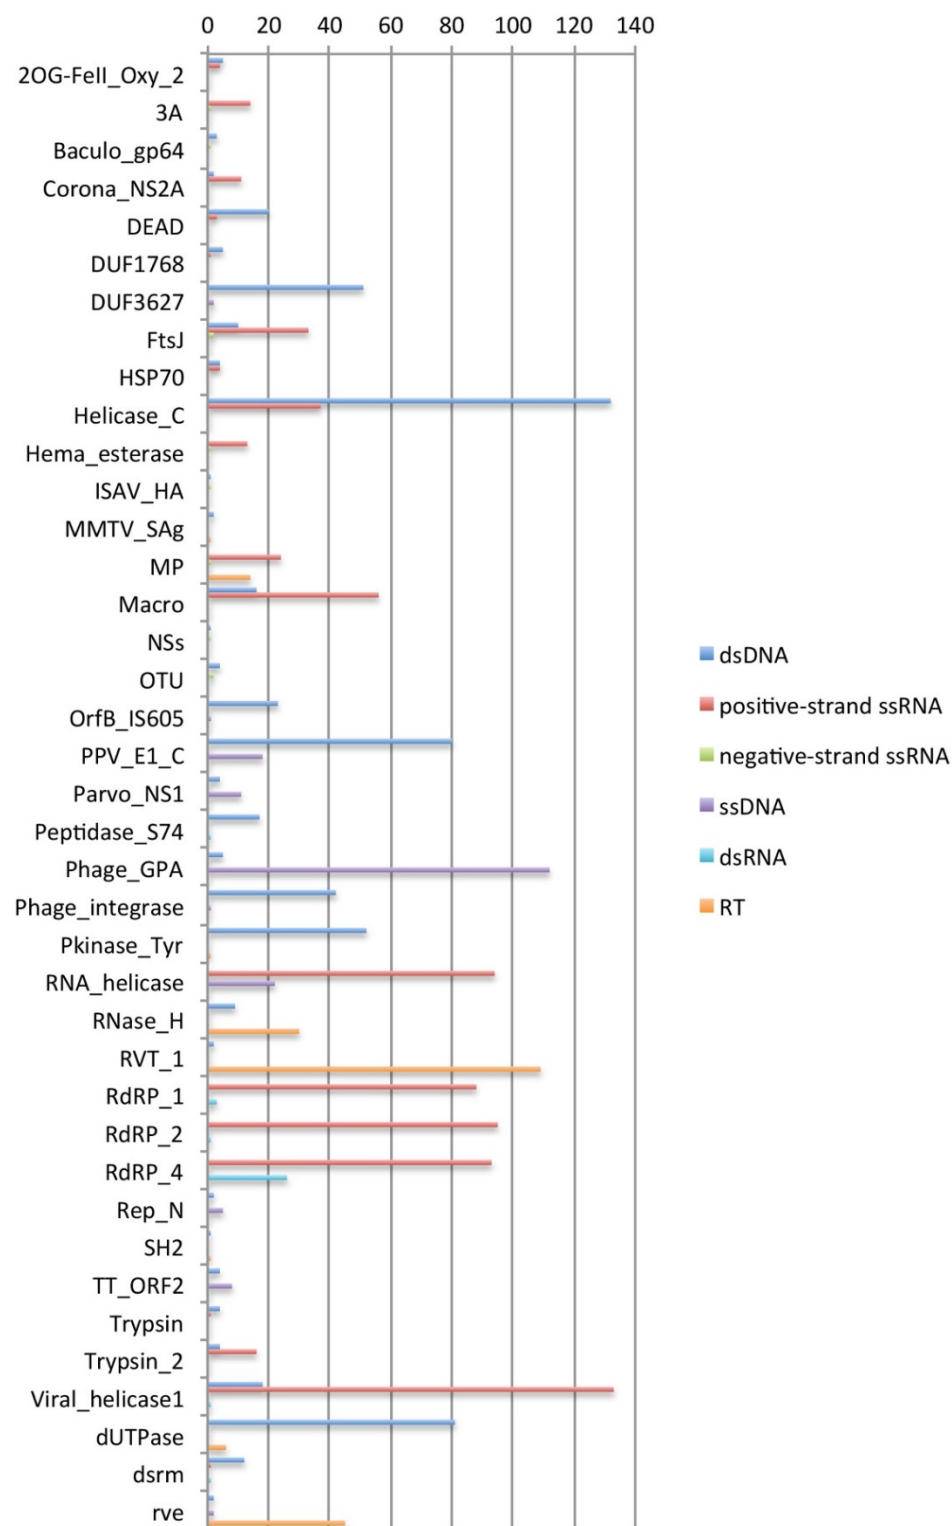

(A)

Figure S1. Cont.

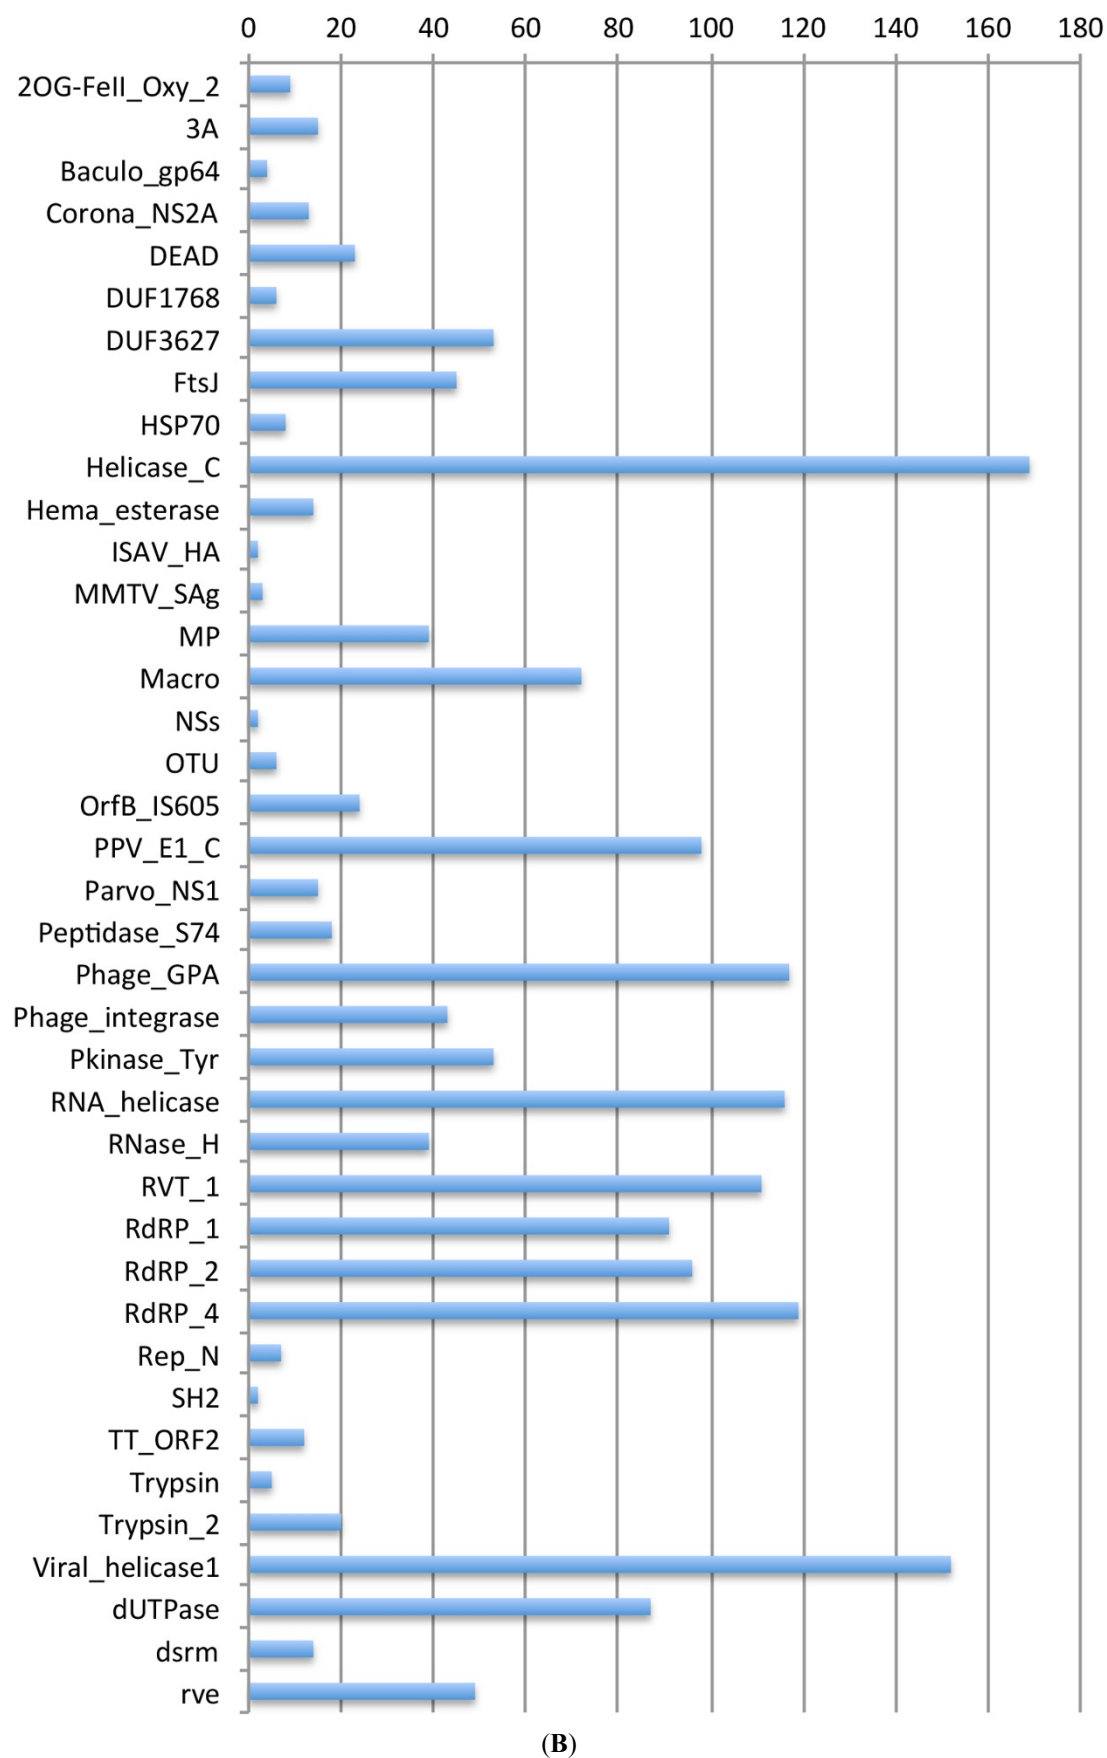

**Figure S1.** The distribution of proteins from viruses with different genome types (A), and the number of hits within viral reference proteome (B) of protein families identified in the HMMer [1] search.

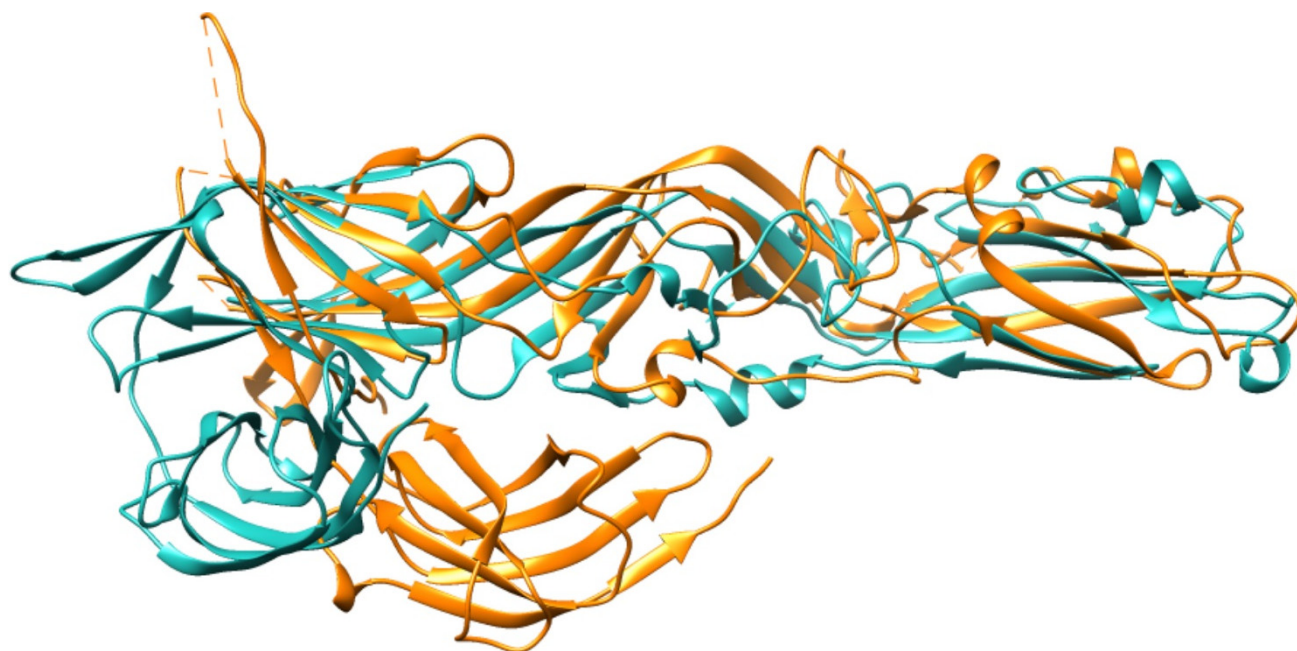

**Figure S2.** Structural superposition between the envelope glycoprotein of Rift Valley fever virus (4HJ1A, cyan) and EFF-1 of *Caenorhabditis elegans* (4OJDH, orange).

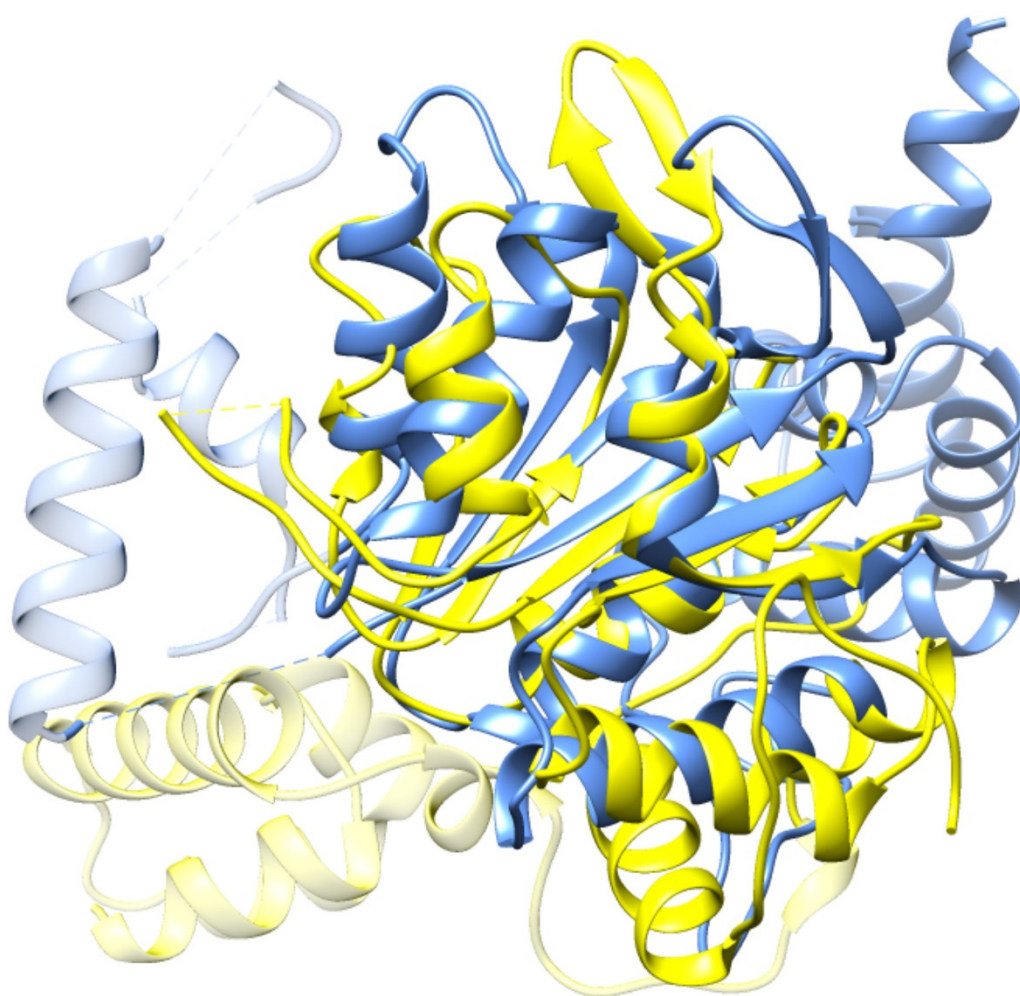

**Figure S3.** Structural superposition between the Adeno-associated virus-2 helicase (1U0JA, yellow) and the human Tip49b ATPase (3UK6E, light blue).

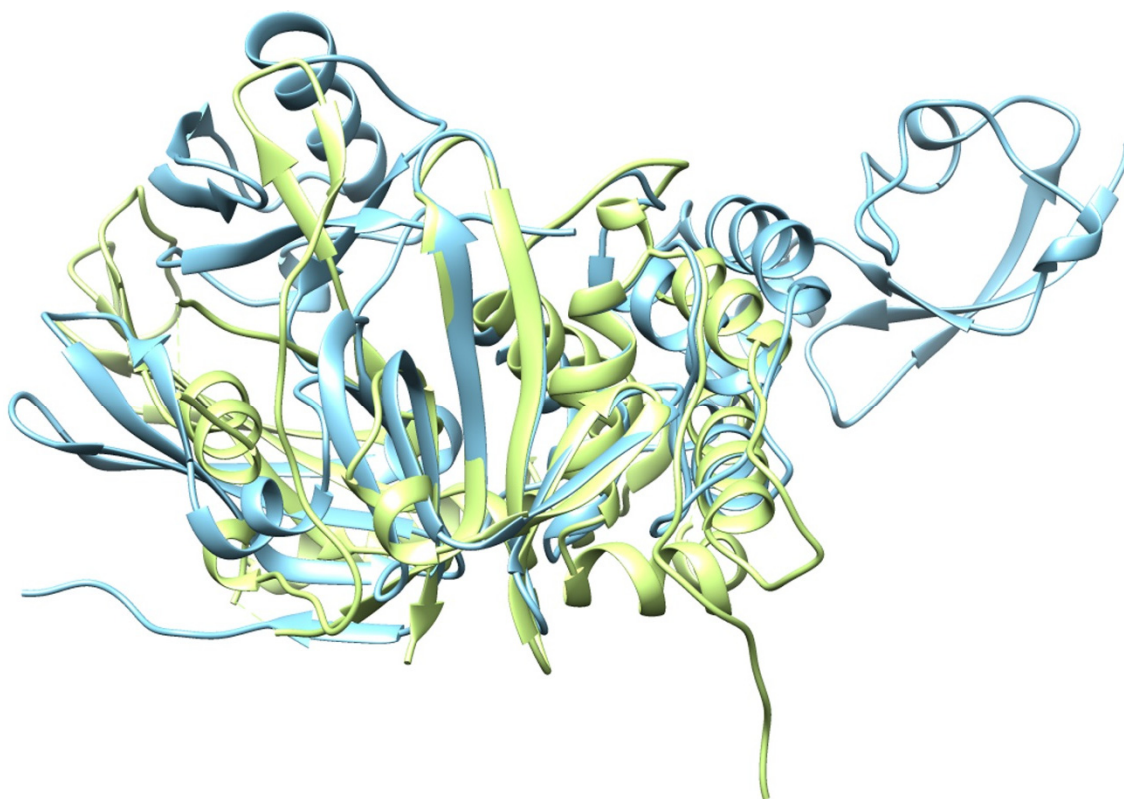

**Figure S4.** Structural superposition between the papain-like protease of SARS Coronavirus, positive-strand ssRNA (4M0WA, cyan) and the human ubiquitin carboxyl-terminal hydrolase 21 (2Y5BA, green).

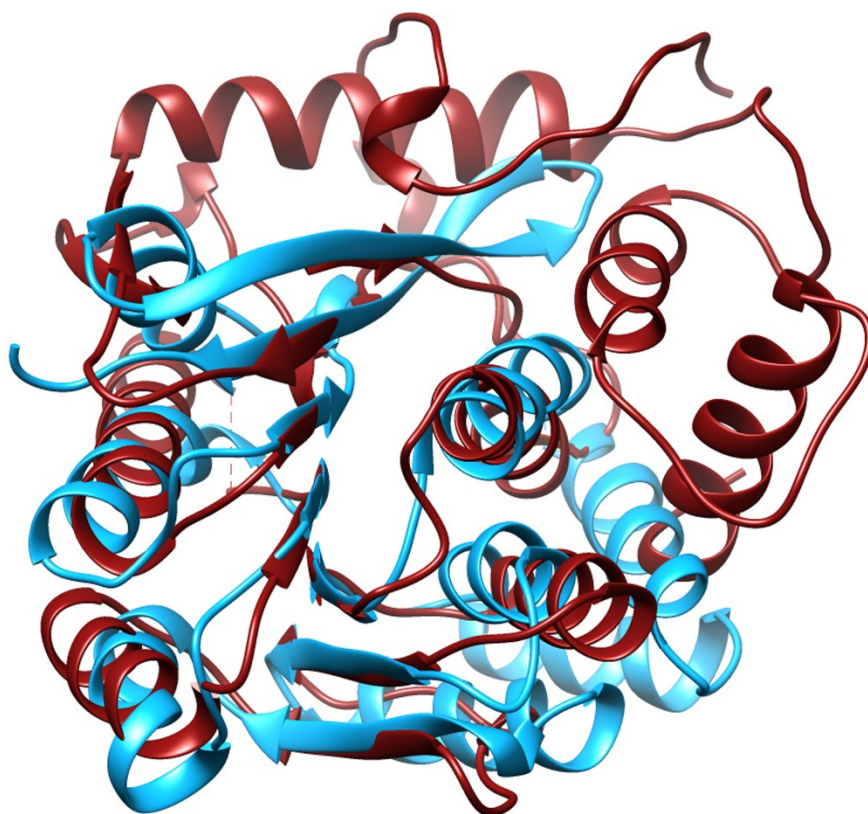

**Figure S5.** Structural superposition between VP39 of Vaccinia virus, dsDNA (3MAGA, dark red) and human catechol-O-methyltransferase (4PYIA, cyan).



**Table S2.** Pfam families comprising proteins from viruses with different genome type identified with HMMer [1].

|                        | dsDNA | Positive-Strand<br>ssRNA | Negative-Strand<br>ssRNA | ssDNA | dsRNA | RT  |
|------------------------|-------|--------------------------|--------------------------|-------|-------|-----|
| <b>2OG-FeII_Oxy_2</b>  | 5     | 4                        | 0                        | 0     | 0     | 0   |
| <b>3A</b>              | 0     | 14                       | 1                        | 0     | 0     | 0   |
| <b>Baculo_gp64</b>     | 3     | 0                        | 1                        | 0     | 0     | 0   |
| <b>Corona_NS2A</b>     | 2     | 11                       | 0                        | 0     | 0     | 0   |
| <b>DEAD</b>            | 20    | 3                        | 0                        | 0     | 0     | 0   |
| <b>DUF1768</b>         | 5     | 1                        | 0                        | 0     | 0     | 0   |
| <b>DUF3627</b>         | 51    | 0                        | 0                        | 2     | 0     | 0   |
| <b>FtsJ</b>            | 10    | 33                       | 2                        | 0     | 0     | 0   |
| <b>HSP70</b>           | 4     | 4                        | 0                        | 0     | 0     | 0   |
| <b>Helicase_C</b>      | 132   | 37                       | 0                        | 0     | 0     | 0   |
| <b>Hema_esterase</b>   | 0     | 13                       | 1                        | 0     | 0     | 0   |
| <b>ISAV_HA</b>         | 1     | 0                        | 1                        | 0     | 0     | 0   |
| <b>MMTV_SAg</b>        | 2     | 0                        | 0                        | 0     | 0     | 1   |
| <b>MP</b>              | 0     | 24                       | 1                        | 0     | 0     | 14  |
| <b>Macro</b>           | 16    | 56                       | 0                        | 0     | 0     | 0   |
| <b>NSs</b>             | 1     | 0                        | 1                        | 0     | 0     | 0   |
| <b>OTU</b>             | 4     | 0                        | 2                        | 0     | 0     | 0   |
| <b>OrfB_IS605</b>      | 23    | 0                        | 0                        | 1     | 0     | 0   |
| <b>PPV_E1_C</b>        | 80    | 0                        | 0                        | 18    | 0     | 0   |
| <b>Parvo_NS1</b>       | 4     | 0                        | 0                        | 11    | 0     | 0   |
| <b>Peptidase_S74</b>   | 17    | 0                        | 0                        | 0     | 1     | 0   |
| <b>Phage_GPA</b>       | 5     | 0                        | 0                        | 112   | 0     | 0   |
| <b>Phage_integrase</b> | 42    | 0                        | 0                        | 1     | 0     | 0   |
| <b>Pkinase_Tyr</b>     | 52    | 0                        | 0                        | 0     | 0     | 1   |
| <b>RNA_helicase</b>    | 0     | 94                       | 0                        | 22    | 0     | 0   |
| <b>RNase_H</b>         | 9     | 0                        | 0                        | 0     | 0     | 30  |
| <b>RVT_1</b>           | 2     | 0                        | 0                        | 0     | 0     | 109 |
| <b>RdRP_1</b>          | 0     | 88                       | 0                        | 0     | 3     | 0   |
| <b>RdRP_2</b>          | 0     | 95                       | 0                        | 0     | 1     | 0   |
| <b>RdRP_4</b>          | 0     | 93                       | 0                        | 0     | 26    | 0   |
| <b>Rep_N</b>           | 2     | 0                        | 0                        | 5     | 0     | 0   |
| <b>SH2</b>             | 1     | 0                        | 0                        | 0     | 0     | 1   |
| <b>TT_ORF2</b>         | 4     | 0                        | 0                        | 8     | 0     | 0   |
| <b>Trypsin</b>         | 4     | 1                        | 0                        | 0     | 0     | 0   |
| <b>Trypsin_2</b>       | 4     | 16                       | 0                        | 0     | 0     | 0   |
| <b>Viral_helicase1</b> | 18    | 133                      | 0                        | 0     | 1     | 0   |
| <b>dUTPase</b>         | 81    | 0                        | 0                        | 0     | 0     | 6   |
| <b>dsrm</b>            | 12    | 1                        | 0                        | 0     | 1     | 0   |
| <b>rve</b>             | 2     | 0                        | 0                        | 2     | 0     | 45  |

## References

1. Finn, R.; Clements, J.; Eddy, S. HMMER web server: Interactive sequence similarity searching. *Nucleic Acids Res.* **2011**, *39*, W29–W37.

© 2015 by the authors; licensee MDPI, Basel, Switzerland. This article is an open access article distributed under the terms and conditions of the Creative Commons Attribution license (<http://creativecommons.org/licenses/by/4.0/>).
